# Supplementary material for: Green Extraction of Graphene from Natural Mineral Shungite
Source: MDPI journal article supplement (doi:10.3390/nano12244356), 2022-12-07
Supplement: s1 [file s1]

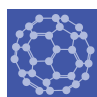

## Article

# Green-Extraction of Graphene from Natural Mineral Shungite - Supplementary Material

Anastasia Novikova and Alina Karabchevsky \*

School of Electrical and Computer Engineering, Ben-Gurion University of the Negev, Beer-Sheva 8410501, Israel

\* Correspondence: alinak@bgu.ac.il

X-ray photoelectron spectrometry has also been used to quantify the relative intensity of components associated with C 1s and O 1s. The data is presented in Table S1.

**Table S1.** Elements Identifier and Quantitative assessment of shungite samples before sonication

| Name | Peak (BE) | FWHM (eV) | Area (CPS·eV) | Atomic (%) |
|------|-----------|-----------|---------------|------------|
| C1S  | 284.76    | 1.16      | 61792.24      | 88.62      |
| O1S  | 532.29    | 3.60      | 21751.34      | 11.38      |

Table S1 shows the XPS spectra of shungite after deconvolution. The main Shungite peak is carbon at 284.76 eV corresponding to sp<sup>2</sup>-hybridized carbon (C=C) and the oxygen peak at 532.29 eV corresponds to C=O. Shungite samples before treatment contain 88.62% hybridized carbon, and oxygen 11.38 %, most likely due to the presence of water in the samples.

Next, the samples were processed by the sonication method. The data obtained are presented in Table S2.

**Table S2.** Elements Identifier and Quantitative assessment of shungite samples after sonication

| Name | Peak (BE) | FWHM (eV) | Area (CPS·eV) | Atomic (%) |
|------|-----------|-----------|---------------|------------|
| C1S  | 284.58    | 1.46      | 16150.69      | 92.41      |
| O1S  | 533.29    | 3.28      | 34194.57      | 7.59       |

Table S2 shows the XPS spectra after deconvolution of the sonicated shungite sample. Table S2 shows the peak of the sp<sup>2</sup> form of carbon, located at 284.5 eV, which is attributed to carbon. The peak is broadened compared to the peaks before treatment, and the concentration increases to 92.41%. The oxygen peak is shifted by 533.29, which corresponds to C-OH bonds and is 7.59%. The data supports our hypothesis that C=O bonds are broken.

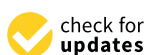

Citation: Novikova, A.;

Karabchevsky, A. Green-Extraction of Graphene from Natural Mineral Shungite. *Nanomaterials* **2022**, *12*, 4356. <https://doi.org/10.3390/nano12244356>

Academic Editors: Wugang Liao and Lin Wang

Received: 17 July 2022

Accepted: 22 August 2022

Published: 7 December 2022

**Publisher's Note:** MDPI stays neutral with regard to jurisdictional claims in published maps and institutional affiliations.

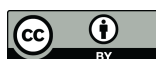

**Copyright:** © 2022 by the authors. Licensee MDPI, Basel, Switzerland. This article is an open access article distributed under the terms and conditions of the Creative Commons Attribution (CC BY) license (<https://creativecommons.org/licenses/by/4.0/>).
